# Supplementary material for: Harnessing calcineurin-FK506-FKBP12 crystal structures from invasive fungal pathogens to develop antifungal agents
Source: PubMed Central journal article supplement (PMC6753081; doi:10.1038/s41467-019-12199-1), 2019-09-19
Supplement: 41467_2019_12199_MOESM3_ESM.pdf [file 41467_2019_12199_MOESM3_ESM.pdf]

### **Description of Additional Supplementary Files**

File Name: Supplementary Data 1

Description: Primers Designed for the Generation of *A. fumigatus* FKBP12 Mutants

File Name: Supplementary Data 2

Description: Primers Designed for the Generation of *A. fumigatus* CnaA Mutants

File Name: Supplementary Data 3

Description: Strains Used and Generated in the Present Study
